# Supplementary material
Source: publisher figshare collection journal article supplement (https://acs.figshare.com/ndownloader/files/23858125)
Supplement: Supplementary file 1 [file 23858125]

# Comparison of Hydrodynamic Cavitation Devices based on Linear and Swirling Flows: Degradation of dichloroaniline in water

Varaha Prasad Sarvothaman<sup>1</sup>, Alister Simpson<sup>2</sup> and Vivek V. Ranade<sup>1,3\*</sup>

Multiphase Reactors & Intensification Group (mRING)

<sup>1</sup>School of Chemistry and Chemical Engineering  
Queen's University Belfast, Belfast BT9 5AG, United Kingdom.

<sup>2</sup>School of Aerospace and Mechanical Engineering  
Queen's University Belfast, Belfast BT9 5AG, United Kingdom.

<sup>3</sup>Bernal Institute,  
University of Limerick, Limerick V94 T9PX, Ireland.

\* Author to whom correspondence should be addressed  
Email: [V.Ranade@qub.ac.uk](mailto:V.Ranade@qub.ac.uk), [Vivek.Ranade@ul.ie](mailto:Vivek.Ranade@ul.ie)

## Supplementary Information

The schematic and relevant dimensions for linear – (orifice/venturi) and vortex-based cavitation devices are shown in Figure S.1.

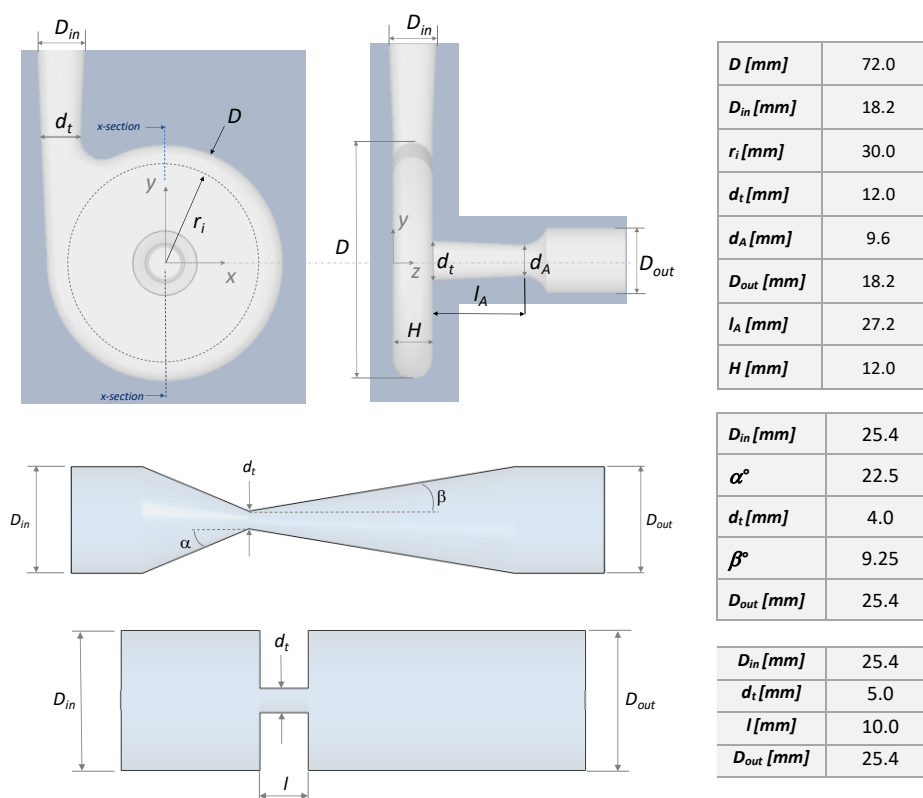

Figure S.1: Schematic of linear and vortex based cavitation devices (Reprinted in part from Simpson, A. and Ranade, V.V., 2019. 110<sup>th</sup> Anniversary: Comparison of Cavitation Devices Based on Linear and Swirling Flows: Hydrodynamic Characteristics. *ACS Ind. Eng. Chem. Res.*, **58**(31), 14488-14509)

The UV-Vis spectroscopy profile for DCA is shown in Figure S.2 (a), the absorption maxima occurs at 241-nm. The calibration curve for analysis was prepared with the absorption maxima and is shown in Figure S.2 (b).

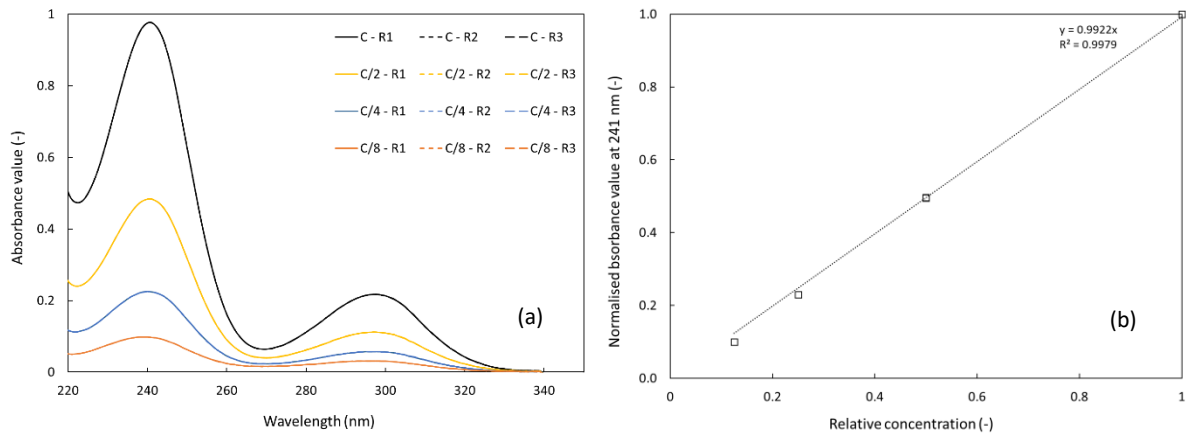

Figure S.2: (a) UV-Vis spectroscopy profile for DCA and (b) UV-Vis calibration curve for DCA.

The degradation profile for device D1 at operating pressure drop conditions of 100 and 200 kPa is presented in Figure S.3. The concentration profiles at 100 and 200 kPa were indistinguishable.

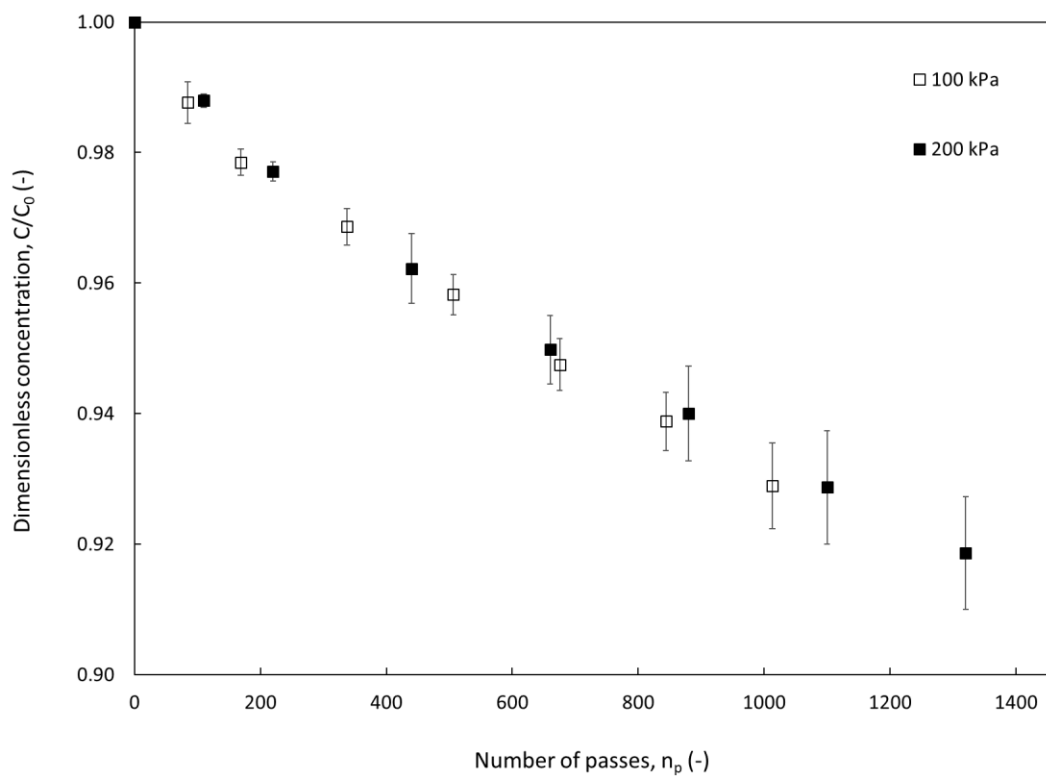

Figure S.3: Influence of pressure drop on degradation of DCA for device D1.
